# Supplementary material for: Polycomb Group Gene OsFIE2 Regulates Rice (Oryza sativa) Seed Development and Grain Filling via a Mechanism Distinct from Arabidopsis
Source: PubMed Central journal article supplement (PMC3591265; doi:10.1371/journal.pgen.1003322), 2013-03-07
Supplement: pgen.1003322.s004.pdf [file pgen.1003322.s004.pdf]

**Table S1.** Endosperm Specific and Nutrient Metabolic Genes Identified by H3K27me3 ChIP Enrichment.

| Locus Number   | Tissue Specificity | Gene Name                                                          | Enriched Region | Analysis of Algorithm | Start position | End position | False Discovery Rate |
|----------------|--------------------|--------------------------------------------------------------------|-----------------|-----------------------|----------------|--------------|----------------------|
| LOC_Os01g11820 | endosperm          | expressed protein                                                  | Upstream        | FindPeaks             | 6392689        | 6393189      | FDR: 2.6848913E-5    |
| LOC_Os02g09310 | endosperm          | cytochrome P450, putative                                          | Upstream        | FindPeaks             | 4789686        | 4790526      | FDR: 0.0011761788    |
| LOC_Os02g09670 | endosperm          | MYB protein, putative, expressed                                   | Upstream        | FindPeaks             | 4965306        | 4965733      | FDR: 0.043232728     |
| LOC_Os02g34370 | endosperm          | expressed protein                                                  | Upstream        | FindPeaks             | 20553531       | 20555681     | FDR: 0.0             |
| LOC_Os02g36670 | endosperm          | hypothetical protein                                               | Upstream        | FindPeaks             | 22131376       | 22132401     | FDR: 0.0032262774    |
| LOC_Os02g46290 | endosperm          | invertase/pectin methylesterase inhibitor family protein, putative | Upstream        | FindPeaks             | 28216717       | 28217191     | FDR: 6.55308E-5      |
| LOC_Os04g49720 | endosperm          | pectinesterase inhibitor domain containing protein, putative       | Upstream        | FindPeaks             | 29467221       | 29468351     | FDR: 0.0             |
| LOC_Os05g16160 | endosperm          | malonyl-CoA isoflavone 7-O-glucoside-6-O-malonyltransferase,       | Upstream        | FindPeaks             | 9135598        | 9136333      | FDR: 3.9670253E-4    |
| LOC_Os05g28830 | endosperm          | PMR5, putative, expressed                                          | Upstream        | FindPeaks             | 16839343       | 16839905     | FDR: 6.55308E-5      |
| LOC_Os05g42120 | endosperm          | heat shock protein, putative, expressed                            | Upstream        | FindPeaks             | 24561970       | 24562865     | FDR: 0.0             |
| LOC_Os05g46150 | endosperm          | OsFBDUF28 - F-box and DUF domain containing protein                | Upstream        | FindPeaks             | 26703362       | 26703900     | FDR: 0.0032262774    |
| LOC_Os06g42910 | endosperm          | expressed protein                                                  | Upstream        | FindPeaks             | 25782276       | 25783038     | FDR: 0.0             |
| LOC_Os07g17010 | endosperm          | chalcone synthase, putative                                        | Upstream        | FindPeaks             | 10015596       | 10015918     | FDR: 0.0             |
| LOC_Os08g03470 | endosperm          | MBTB15 - Bric-a-Brac, Tramtrack, Broad Complex BTB domain          | Upstream        | FindPeaks             | 1625149        | 1626073      | FDR: 0.0032262774    |
| LOC_Os08g04740 | endosperm          | expressed protein                                                  | Upstream        | FindPeaks             | 2366880        | 2368036      | FDR: 1.2576507E-4    |
| LOC_Os09g14550 | endosperm          | RNA recognition motif containing protein, putative, expressed      | Upstream        | FindPeaks             | 8610386        | 8611307      | FDR: 0.0             |
| LOC_Os09g25890 | endosperm          | trehalose-6-phosphate synthase                                     | Upstream        | FindPeaks             | 15529204       | 15530268     | FDR: 3.9670253E-4    |
| LOC_Os10g04890 | endosperm          | expressed protein                                                  | Upstream        | FindPeaks             | 2370834        | 2372200      | FDR: 0.0             |
| LOC_Os11g08220 | endosperm          | DEFL28 - Defensin and Defensin-like DEFL family                    | Upstream        | FindPeaks             | 4310010        | 4310382      | FDR: 0.043232728     |
| LOC_Os11g11430 | endosperm          | OsIAA29 - Auxin-responsive Aux/IAA gene family                     | Upstream        | FindPeaks             | 6351571        | 6351984      | FDR: 3.9670253E-4    |
| LOC_Os02g28580 | endospermTF        | expressed protein                                                  | Upstream        | FindPeaks             | 16908139       | 16909135     | FDR: 0.01937338      |
| LOC_Os04g35010 | endosperm TF       | helix-loop-helix DNA-binding domain containing protein             | Upstream        | FindPeaks             | 21101993       | 21102904     | FDR: 0.043232728     |
| LOC_Os09g34880 | endosperm TF       | basic region leucine zipper domain containing protein              | Upstream        | FindPeaks             | 20324277       | 20324812     | FDR: 0.043232728     |
| LOC_Os09g38010 | endosperm TF       | no apical meristem protein, putative,                              | Upstream        | FindPeaks             | 21904729       | 21906062     | FDR: 0.0             |
| LOC_Os01g03890 | Nutrition          | DUF260 domain containing protein, putative, expressed              | Upstream        | FindPeaks             | 1653889        | 1655768      | FDR: 0.0             |
| LOC_Os01g07850 | Nutrition          | glyoxalase family protein, putative, expressed                     | Upstream        | FindPeaks             | 3775760        | 3777027      | FDR: 2.6308867E-6    |
| LOC_Os01g49660 | Nutrition          | reticulon domain containing protein, putative                      | Upstream        | FindPeaks             | 28537133       | 28537781     | FDR: 0.0032262774    |
| LOC_Os01g68580 | Nutrition          | LTPL38 - Protease inhibitor/seed storage/LTP family protein        | Upstream        | FindPeaks             | 39833149       | 39835356     | FDR: 0.0             |
| LOC_Os01g68589 | Nutrition          | LTPL39 - Protease inhibitor/seed storage/LTP family protein        | Upstream        | FindPeaks             | 39835377       | 39836386     | FDR: 0.0             |
| LOC_Os02g14600 | Nutrition          | glutelin, putative, expressed                                      | Upstream        | FindPeaks             | 8055085        | 8055792      | FDR: 0.01937338      |
| LOC_Os02g56320 | Nutrition          | glycogen synthase 1, putative, expressed                           | Upstream        | FindPeaks             | 34467168       | 34468703     | FDR: 0.0             |
| LOC_Os03g18130 | Nutrition          | asparagine synthetase, putative, expressed                         | Upstream        | FindPeaks             | 10124005       | 10124519     | FDR: 0.043232728     |
| LOC_Os03g21080 | Nutrition          | guanine nucleotide exchange factor, putative, expressed            | Upstream        | FindPeaks             | 11998896       | 11999238     | FDR: 0.043232728     |
| LOC_Os03g24460 | Nutrition          | aminotransferase domain containing protein, putative,              | Upstream        | FindPeaks             | 13948766       | 13950830     | FDR: 0.0032262774    |
| LOC_Os03g63330 | Nutrition          | aspartokinase, chloroplast precursor, putative, expressed          | Upstream        | FindPeaks             | 35781791       | 35782147     | FDR: 0.0             |
| LOC_Os04g49980 | Nutrition          | late embryogenesis abundant group I                                | Upstream        | FindPeaks             | 29624425       | 29626020     | FDR: 0.0             |

|                |           |                                                              |          |           |          |          |                   |
|----------------|-----------|--------------------------------------------------------------|----------|-----------|----------|----------|-------------------|
| LOC_Os04g50970 | Nutrition | seed specific protein Bn15D1B, putative, expressed           | Upstream | FindPeaks | 29989667 | 29990073 | FDR: 0.043232728  |
| LOC_Os05g39320 | Nutrition | Thiamine pyrophosphate enzyme, C-terminal TPP binding        | Upstream | FindPeaks | 23001511 | 23002166 | FDR: 6.55308E-5   |
| LOC_Os05g47640 | Nutrition | threonine synthase, chloroplast precursor, putative          | Upstream | FindPeaks | 27226721 | 27227326 | FDR: 3.9670253E-4 |
| LOC_Os06g01580 | Nutrition | LTPL127 - Protease inhibitor/seed storage/LTP family protein | Upstream | FindPeaks | 341345   | 341719   | FDR: 3.9670253E-4 |
| LOC_Os06g04200 | Nutrition | starch synthase, putative, expressed                         | Upstream | FindPeaks | 1763313  | 1764260  | FDR: 0.0          |
| LOC_Os06g13450 | Nutrition | cystathionine beta-lyase, putative                           | Upstream | FindPeaks | 7397462  | 7399808  | FDR: 0.0          |
| LOC_Os07g04910 | Nutrition | reticulon domain containing protein, putative, expressed     | Upstream | FindPeaks | 2167465  | 2168475  | FDR: 0.0          |
| LOC_Os07g06660 | Nutrition | glyoxalase family protein, putative, expressed               | Upstream | FindPeaks | 3248302  | 3249133  | FDR: 0.0032262774 |
| LOC_Os08g01760 | Nutrition | dehydrogenase, putative, expressed                           | Upstream | FindPeaks | 456023   | 456644   | FDR: 0.043232728  |
| LOC_Os08g36900 | Nutrition | alpha-amylase precursor, putative, expressed                 | Upstream | FindPeaks | 23331075 | 23331650 | FDR: 3.9670253E-4 |
| LOC_Os09g28400 | Nutrition | alpha-amylase precursor, putative, expressed                 | Upstream | FindPeaks | 17285839 | 17286349 | FDR: 0.0032262774 |
| LOC_Os10g26010 | Nutrition | cystathionine gamma-synthase, putative, expressed            | Upstream | FindPeaks | 13392815 | 13394750 | FDR: 0.0          |
| LOC_Os10g33800 | Nutrition | lactate/malate dehydrogenase, putative, expressed            | Upstream | FindPeaks | 17839380 | 17840744 | FDR: 0.0          |
| LOC_Os11g34780 | Nutrition | globulin 2, putative                                         | Upstream | FindPeaks | 19908931 | 19910163 | FDR: 1.2576507E-4 |
| LOC_Os11g37280 | Nutrition | LTPL68 - Protease inhibitor/seed storage/LTP family protein  | Upstream | FindPeaks | 21549315 | 21549785 | FDR: 2.6848913E-5 |
| LOC_Os01g06240 | endosperm | protein kinase, putative, expressed                          | Within   | FindPeaks | 2961702  | 2962350  | FDR: 0.008066991  |
| LOC_Os01g58290 | endosperm | OsSub9 - Putative Subtilisin homologue, expressed            | Within   | FindPeaks | 33691445 | 33692229 | FDR: 0.0032262774 |
| LOC_Os01g58660 | endosperm | LTPL29 - Protease inhibitor/seed storage/LTP family protein  | Within   | FindPeaks | 33909249 | 33911042 | FDR: 0.0          |
| LOC_Os02g09190 | endosperm | cytochrome P450, putative, expressed                         | Within   | FindPeaks | 4721375  | 4722351  | FDR: 0.0032262774 |
| LOC_Os02g09270 | endosperm | cytochrome P450 71A1, putative                               | Within   | FindPeaks | 4776209  | 4776736  | FDR: 6.55308E-5   |
| LOC_Os02g09290 | endosperm | cytochrome P450 71D10, putative, expressed                   | Within   | FindPeaks | 4784927  | 4785601  | FDR: 0.008066991  |
| LOC_Os02g24010 | endosperm | hypothetical protein                                         | Within   | FindPeaks | 13909898 | 13910421 | FDR: 2.6E-5       |
| LOC_Os02g29230 | endosperm | conserved hypothetical protein                               | Within   | FindPeaks | 17352952 | 17353765 | FDR: 0.01937338   |
| LOC_Os02g34360 | endosperm | conserved hypothetical protein                               | Within   | FindPeaks | 20549294 | 20551213 | FDR: 0.0          |
| LOC_Os02g48570 | endosperm | peptide transporter PTR2, putative, expressed                | Within   | FindPeaks | 29732804 | 29733551 | FDR: 0.0011761788 |
| LOC_Os03g17130 | endosperm | bHelix-loop-helix transcription factor, putative, expressed  | Within   | FindPeaks | 9512956  | 9513469  | FDR: 0.01937338   |
| LOC_Os03g29614 | endosperm | myb-like DNA-binding domain containing protein, putative     | Within   | FindPeaks | 16878390 | 16879071 | FDR: 0.008066991  |
| LOC_Os04g12639 | endosperm | carboxyl-terminal proteinase, putative, expressed            | Within   | FindPeaks | 6993795  | 6994670  | FDR: 0.0          |
| LOC_Os04g35000 | endosperm | expressed protein                                            | Within   | FindPeaks | 21100516 | 21101266 | FDR: 6.55308E-5   |
| LOC_Os05g07850 | endosperm | receptor-like kinase, putative                               | Within   | FindPeaks | 4234341  | 4235113  | FDR: 0.0          |
| LOC_Os05g47820 | endosperm | expressed protein                                            | Within   | FindPeaks | 27349726 | 27350398 | FDR: 0.01937338   |
| LOC_Os05g50920 | endosperm | transmembrane amino acid transporter protein, putative       | Within   | FindPeaks | 29160936 | 29161515 | FDR: 0.008066991  |
| LOC_Os07g01700 | endosperm | DEFL2 - Defensin and Defensin-like DEFL family, expressed    | Within   | FindPeaks | 417112   | 418984   | FDR: 0.0          |
| LOC_Os07g17520 | endosperm | conserved hypothetical protein                               | Within   | FindPeaks | 10350860 | 10352880 | FDR: 0.0          |
| LOC_Os08g16650 | endosperm | hypothetical protein                                         | Within   | FindPeaks | 10186609 | 10187483 | FDR: 6.55308E-5   |
| LOC_Os10g04900 | endosperm | OsFBX364 - F-box domain containing protein, expressed        | Within   | FindPeaks | 2384122  | 2386421  | FDR: 0.0          |
| LOC_Os10g07998 | endosperm | nodulin, putative, expressed                                 | Within   | FindPeaks | 4310312  | 4311338  | FDR: 0.0          |
| LOC_Os11g03270 | endosperm | nucleoside-triphosphatase, putative                          | Within   | FindPeaks | 1200811  | 1202107  | FDR: 1.2576507E-4 |
| LOC_Os11g14880 | endosperm | LTPL32 - Protease inhibitor/seed storage/LTP family protein  | Within   | FindPeaks | 8367827  | 8368531  | FDR: 0.0          |
| LOC_Os12g08780 | endosperm | flavin monooxygenase, putative, expressed                    | Within   | FindPeaks | 4514118  | 4514738  | FDR: 0.0          |
| LOC_Os12g28090 | endosperm | expressed protein                                            | Within   | FindPeaks | 16580214 | 16580755 | FDR: 0.01937338   |

|                |              |                                                                |        |           |          |          |                   |
|----------------|--------------|----------------------------------------------------------------|--------|-----------|----------|----------|-------------------|
| LOC_Os06g40330 | endosperm TF | MYB family transcription factor                                | Within | FindPeaks | 24010229 | 24011436 | FDR: 0.0          |
| LOC_Os10g25850 | endosperm TF | nuclear transcription factor Y subunit, putative, expressed    | Within | FindPeaks | 13322384 | 13322963 | FDR: 0.043232728  |
| LOC_Os01g18860 | Nutrition    | S-adenosylmethionine synthetase, putative, expressed           | Within | FindPeaks | 10658710 | 10659768 | FDR: 0.043232728  |
| LOC_Os01g52250 | Nutrition    | starch synthase, putative, expressed                           | Within | FindPeaks | 30029658 | 30030075 | FDR: 3.9E-4       |
| LOC_Os01g55630 | Nutrition    | glutelin, putative                                             | Within | FindPeaks | 32051748 | 32052917 | FDR: 0.043232728  |
| LOC_Os01g63810 | Nutrition    | starch binding domain containing protein, putative             | Within | FindPeaks | 37020968 | 37021639 | FDR: 0.01937338   |
| LOC_Os01g70700 | Nutrition    | conserved hypothetical protein                                 | Within | FindPeaks | 40927684 | 40928231 | FDR: 1.2576507E-4 |
| LOC_Os02g15090 | Nutrition    | glutelin, putative, expressed                                  | Within | FindPeaks | 8408517  | 8409569  | FDR: 0.0          |
| LOC_Os02g52700 | Nutrition    | alpha-amylase precursor, putative, expressed                   | Within | FindPeaks | 32237372 | 32238065 | FDR: 0.043232728  |
| LOC_Os03g11660 | Nutrition    | cysteine synthase, putative, expressed                         | Within | FindPeaks | 6084334  | 6085408  | FDR: 0.008066991  |
| LOC_Os03g41080 | Nutrition    | seed maturation protein PM23, putative, expressed              | Within | FindPeaks | 22828860 | 22829549 | FDR: 0.043232728  |
| LOC_Os03g42110 | Nutrition    | semialdehyde dehydrogenase, NAD binding domain containing      | Within | FindPeaks | 23436276 | 23436759 | FDR: 0.008066991  |
| LOC_Os03g46100 | Nutrition    | cupin domain containing protein, expressed                     | Within | FindPeaks | 26068251 | 26069753 | FDR: 0.0          |
| LOC_Os04g44470 | Nutrition    | KUN1 - Kunitz-type trypsin inhibitor precursor, expressed      | Within | FindPeaks | 26138496 | 26138842 | FDR: 0.008066991  |
| LOC_Os04g46560 | Nutrition    | lactate/malate dehydrogenase, putative, expressed              | Within | FindPeaks | 27423157 | 27423547 | FDR: 0.043232728  |
| LOC_Os04g58720 | Nutrition    | anthranilate phosphoribosyltransferase, putative, expressed    | Within | FindPeaks | 34734430 | 34736426 | FDR: 0.0011761788 |
| LOC_Os05g04510 | Nutrition    | S-adenosylmethionine synthetase, putative, expressed           | Within | FindPeaks | 2090452  | 2090870  | FDR: 0.01937338   |
| LOC_Os05g29880 | Nutrition    | 3-hydroxyacyl-CoA dehydrogenase, putative, expressed           | Within | FindPeaks | 17234000 | 17234430 | FDR: 0.01937338   |
| LOC_Os05g37450 | Nutrition    | starch binding domain containing protein, putative             | Within | FindPeaks | 21852286 | 21852920 | FDR: 1.2576507E-4 |
| LOC_Os05g39310 | Nutrition    | thiamine pyrophosphate enzyme, C-terminal TPP binding domain   | Within | FindPeaks | 22997130 | 22997881 | FDR: 6.55308E-5   |
| LOC_Os05g45720 | Nutrition    | starch synthase, putative, expressed                           | Within | FindPeaks | 26431152 | 26431496 | FDR: 0.0032262774 |
| LOC_Os06g02040 | Nutrition    | late embryogenesis abundant group 1, putative, expressed       | Within | FindPeaks | 591652   | 593462   | FDR: 0.0          |
| LOC_Os06g12450 | Nutrition    | soluble starch synthase 2-3, chloroplast precursor, putative,  | Within | FindPeaks | 6750904  | 6751485  | FDR: 0.01937338   |
| LOC_Os06g35540 | Nutrition    | aminotransferase, classes I and II, domain containing protein  | Within | FindPeaks | 20725540 | 20726302 | FDR: 2.6848913E-5 |
| LOC_Os06g49970 | Nutrition    | alpha-amylase precursor, putative, expressed                   | Within | FindPeaks | 30264503 | 30265965 | FDR: 0.008066991  |
| LOC_Os07g11310 | Nutrition    | LTPL166 - Protease inhibitor/seed storage/LTP family protein   | Within | FindPeaks | 6236698  | 6238140  | FDR: 0.0          |
| LOC_Os07g11410 | Nutrition    | RAL5 - Seed allergenic protein RA5/RA14/RA17 precursor         | Within | FindPeaks | 6274868  | 6276023  | FDR: 2.6308867E-6 |
| LOC_Os07g11510 | Nutrition    | RAL6 - Seed allergenic protein RA5/RA14/RA17 precursor         | Within | FindPeaks | 6333557  | 6335139  | FDR: 0.0          |
| LOC_Os07g11920 | Nutrition    | PROLM22 - Prolamin precursor, expressed                        | Within | FindPeaks | 6613059  | 6616110  | FDR: 0.0          |
| LOC_Os07g49250 | Nutrition    | thiamine pyrophosphate enzyme, C-terminal TPP binding domain   | Within | FindPeaks | 29490574 | 29491339 | FDR: 0.01937338   |
| LOC_Os08g09200 | Nutrition    | aconitate hydratase protein, putative, expressed               | Within | FindPeaks | 5331601  | 5332298  | FDR: 2.6308867E-6 |
| LOC_Os08g29170 | Nutrition    | dehydrogenase, putative, expressed                             | Within | FindPeaks | 17853210 | 17853727 | FDR: 0.043232728  |
| LOC_Os08g44530 | Nutrition    | dihydroxy-acid dehydratase, putative, expressed                | Within | FindPeaks | 28001765 | 28002545 | FDR: 0.043232728  |
| LOC_Os09g16650 | Nutrition    | legume lectins beta domain containing protein, putative        | Within | FindPeaks | 10203145 | 10203938 | FDR: 0.008066991  |
| LOC_Os09g28420 | Nutrition    | alpha-amylase precursor, putative, expressed                   | Within | FindPeaks | 17302038 | 17302789 | FDR: 0.043232728  |
| LOC_Os09g28570 | Nutrition    | zinc-binding alcohol dehydrogenase domain-containing protein 2 | Within | FindPeaks | 17376381 | 17376616 | FDR:              |
| LOC_Os10g11140 | Nutrition    | phosphoglucomutase, putative, expressed                        | Within | FindPeaks | 6188088  | 6188611  | FDR: 0.0011761788 |
| LOC_Os10g25930 | Nutrition    | cystathionine gamma-synthase, putative                         | Within | FindPeaks | 13366508 | 13367009 | FDR: 6.55308E-5   |
| LOC_Os10g25950 | Nutrition    | cystathionine gamma-synthase, putative                         | Within | FindPeaks | 13378393 | 13379211 | FDR: 0.008066991  |
| LOC_Os10g30156 | Nutrition    | starch synthase, putative, expressed                           | Within | FindPeaks | 15609294 | 15610036 | FDR: 0.0          |
| LOC_Os10g30970 | Nutrition    | expressed protein                                              | Within | FindPeaks | 16095317 | 16096104 | FDR: 1.2576507E-4 |

|                |              |                                                                     |            |           |          |          |                   |
|----------------|--------------|---------------------------------------------------------------------|------------|-----------|----------|----------|-------------------|
| LOC_Os10g37340 | Nutrition    | cystathionine gamma-synthase, putative,                             | Within     | FindPeaks | 19930001 | 19930434 | FDR: 0.0011761788 |
| LOC_Os11g34660 | Nutrition    | LTPL98 - Protease inhibitor/seed storage/LTP family protein         | Within     | FindPeaks | 19841421 | 19841700 | FDR: 0.0011761788 |
| LOC_Os01g28810 | endosperm    | expressed protein                                                   | Downstream | FindPeaks | 16132384 | 16132970 | FDR: 3.9670253E-4 |
| LOC_Os01g48580 | endosperm    | ubiquitin-conjugating enzyme E2, putative                           | Downstream | FindPeaks | 27861753 | 27862267 | FDR: 0.0032262774 |
| LOC_Os01g60050 | endosperm    | HEAT, putative                                                      | Downstream | FindPeaks | 34728611 | 34729558 | FDR: 0.01937338   |
| LOC_Os02g25860 | endosperm    | glutelin, putative, expressed                                       | Downstream | FindPeaks | 15149387 | 15149707 | FDR: 0.0032262774 |
| LOC_Os02g43030 | endosperm    | integral membrane protein, putative, expressed                      | Downstream | FindPeaks | 25902876 | 25903498 | FDR: 0.043232728  |
| LOC_Os02g46270 | endosperm    | hypothetical protein                                                | Downstream | FindPeaks | 28213190 | 28213832 | FDR: 0.01937338   |
| LOC_Os04g20774 | endosperm    | pumilio-family RNA binding repeat containing protein, expressed     | Downstream | FindPeaks | 11652005 | 11652948 | FDR: 0.0          |
| LOC_Os04g34510 | endosperm    | expressed protein                                                   | Downstream | FindPeaks | 20721543 | 20723470 | FDR: 3.9670253E-4 |
| LOC_Os05g03870 | endosperm    | expressed protein                                                   | Downstream | FindPeaks | 1722694  | 1723260  | FDR: 0.01937338   |
| LOC_Os06g04930 | endosperm    | expressed protein                                                   | Downstream | FindPeaks | 2167125  | 2168790  | FDR: 0.0          |
| LOC_Os06g06260 | endosperm    | GDSL-like lipase/acylhydrolase, putative, expressed                 | Downstream | FindPeaks | 2899904  | 2900360  | FDR: 0.043232728  |
| LOC_Os06g07700 | endosperm    | conserved hypothetical protein                                      | Downstream | FindPeaks | 3719372  | 3721122  | FDR: 0.0          |
| LOC_Os06g33490 | endosperm    | CAPIP1, putative                                                    | Downstream | FindPeaks | 19505796 | 19506767 | FDR: 1.2576507E-4 |
| LOC_Os06g51084 | endosperm    | 1,4-alpha-glucan-branching enzyme, chloroplast precursor, putative  | Downstream | FindPeaks | 30894028 | 30895075 | FDR: 0.0032262774 |
| LOC_Os06g51140 | endosperm    | ZOS6-11 - C2H2 zinc finger protein, expressed                       | Downstream | FindPeaks | 30931468 | 30933501 | FDR: 0.0          |
| LOC_Os07g17460 | endosperm    | OsFBL36 - F-box domain and LRR containing protein                   | Downstream | FindPeaks | 10301577 | 10303273 | FDR: 0.0          |
| LOC_Os07g31470 | endosperm    | MYB family transcription factor,                                    | Downstream | FindPeaks | 18655567 | 18656659 | FDR: 0.0          |
| LOC_Os09g16260 | endosperm    | expressed protein                                                   | Downstream | FindPeaks | 9917993  | 9918828  | FDR: 0.0          |
| LOC_Os10g04980 | endosperm    | OsFBX365 - F-box domain containing protein, expressed               | Downstream | FindPeaks | 2417211  | 2419154  | FDR: 0.0          |
| LOC_Os11g45360 | endosperm    | DEFL15 - Defensin and Defensin-like DEFL family                     | Downstream | FindPeaks | 26964268 | 26964719 | FDR: 0.01937338   |
| LOC_Os12g39910 | endosperm    | hypothetical protein                                                | Downstream | FindPeaks | 24625269 | 24627050 | FDR: 0.0          |
| LOC_Os05g28320 | endosperm TF | myb-like DNA-binding domain containing protein, putative            | Downstream | FindPeaks | 16521019 | 16523185 | FDR: 0.0          |
| LOC_Os09g31390 | endosperm TF | transcription factor, putative, expressed                           | Downstream | FindPeaks | 18866552 | 18867187 | FDR: 0.043232728  |
| LOC_Os12g39400 | endosperm TF | ZOS12-09 - C2H2 zinc finger protein, expressed                      | Downstream | FindPeaks | 24201010 | 24201961 | FDR: 6.55308E-5   |
| LOC_Os01g46600 | Nutrition    | seed maturation protein PM41, putative, expressed                   | Downstream | FindPeaks | 26530041 | 26530703 | FDR: 0.043232728  |
| LOC_Os01g51210 | Nutrition    | uncharacterized protein PA4923, putative, expressed                 | Downstream | FindPeaks | 29435593 | 29435976 | FDR: 0.008066991  |
| LOC_Os01g55540 | Nutrition    | aminotransferase, classes I and II, domain containing protein       | Downstream | FindPeaks | 31995355 | 31996938 | FDR: 0.0          |
| LOC_Os02g03690 | Nutrition    | beta-amylase, putative, expressed                                   | Downstream | FindPeaks | 1549495  | 1549864  | FDR: 0.008066991  |
| LOC_Os02g06720 | Nutrition    | WD domain containing protein, putative, expressed                   | Downstream | FindPeaks | 3360761  | 3361599  | FDR: 0.01937338   |
| LOC_Os02g24020 | Nutrition    | dihydrodipicolinate reductase, putative, expressed                  | Downstream | FindPeaks | 13909898 | 13910421 | FDR: 2.6848913E-5 |
| LOC_Os02g32660 | Nutrition    | 1,4-alpha-glucan-branching enzyme, chloroplast precursor, putative  | Downstream | FindPeaks | 19348075 | 19348812 | FDR: 0.043232728  |
| LOC_Os03g14630 | Nutrition    | LTPL106 - Protease inhibitor/seed storage/LTP family protein        | Downstream | FindPeaks | 7941908  | 7943581  | FDR: 0.0          |
| LOC_Os03g19390 | Nutrition    | TENA/THI-4 family protein, putative, expressed                      | Downstream | FindPeaks | 10907870 | 10908740 | FDR: 0.0032262774 |
| LOC_Os03g31360 | Nutrition    | glutelin, putative, expressed                                       | Downstream | FindPeaks | 17865337 | 17866016 | FDR: 0.0          |
| LOC_Os03g50510 | Nutrition    | threonine dehydratase biosynthetic, chloroplast precursor, putative | Downstream | FindPeaks | 28838192 | 28839680 | FDR: 0.0032262774 |
| LOC_Os03g56900 | Nutrition    | reticulon domain containing protein                                 | Downstream | FindPeaks | 32392898 | 32394125 | FDR: 0.0432       |
| LOC_Os03g58480 | Nutrition    | seed specific protein Bn15D14A, putative, expressed                 | Downstream | FindPeaks | 33308724 | 33309340 | FDR: 0.01937338   |
| LOC_Os04g08270 | Nutrition    | pullulanase precursor, putative, expressed                          | Downstream | FindPeaks | 4415018  | 4415579  | FDR: 0.043232728  |
| LOC_Os04g46370 | Nutrition    | L-asparaginase precursor protein, putative, expressed               | Downstream | FindPeaks | 27307809 | 27308368 | FDR: 3.9670253E-4 |

|                |                                      |                                                                |            |           |          |          |                   |
|----------------|--------------------------------------|----------------------------------------------------------------|------------|-----------|----------|----------|-------------------|
| LOC_Os05g06300 | Nutrition                            | 3-hydroxyacyl-CoA dehydrogenase, putative, expressed           | Downstream | FindPeaks | 3217579  | 3218122  | FDR: 0.043232728  |
| LOC_Os05g49800 | Nutrition                            | ketol-acid reductoisomerase, chloroplast precursor, putative   | Downstream | FindPeaks | 28515099 | 28516096 | FDR: 0.01937338   |
| LOC_Os07g11320 | Nutrition                            | RAL1 - Seed allergenic protein RA5/RA14/RA17 precursor         | Downstream | FindPeaks | 6238361  | 6238703  | FDR: 3.9670253E-4 |
| LOC_Os07g11330 | Nutrition                            | RAL2 - Seed allergenic protein RA5/RA14/RA17 precursor         | Downstream | FindPeaks | 6240518  | 6241350  | FDR: 0.0          |
| LOC_Os07g11360 | Nutrition                            | RAL3 - Seed allergenic protein RA5/RA14/RA17 precursor         | Downstream | FindPeaks | 6251780  | 6252459  | FDR: 0.008066991  |
| LOC_Os07g11380 | Nutrition                            | RAL4 - Seed allergenic protein RA5/RA14/RA17                   | Downstream | FindPeaks | 6256457  | 6257160  | FDR: 0.0          |
| LOC_Os07g11630 | Nutrition                            | LTPL163 - Protease inhibitor/seed storage/LTP family protein   | Downstream | FindPeaks | 6413026  | 6413834  | FDR: 1.2576507E-4 |
| LOC_Os07g12090 | Nutrition                            | LTPL165 - Protease inhibitor/seed storage/LTP family protein   | Downstream | FindPeaks | 6743386  | 6743918  | FDR: 0.01937338   |
| LOC_Os08g36910 | Nutrition                            | alpha-amylase precursor, putative, expressed                   | Downstream | FindPeaks | 23341766 | 23342310 | FDR: 3.9670253E-4 |
| LOC_Os08g40930 | Nutrition                            | Alpha amylase, catalytic domain containing protein             | Downstream | FindPeaks | 25887090 | 25887788 | FDR: 3.9670253E-4 |
| LOC_Os09g10620 | Nutrition                            | seed maturation protein LEA 4, putative                        | Downstream | FindPeaks | 5789631  | 5789971  | FDR: 0.01937338   |
| LOC_Os09g37120 | Nutrition                            | pyridoxal-dependent decarboxylase protein, putative, expressed | Downstream | FindPeaks | 21406580 | 21407047 | FDR: 0.01937338   |
| LOC_Os10g40200 | Nutrition                            | aminotransferase domain containing protein, putative           | Downstream | FindPeaks | 21454583 | 21455235 | FDR: 0.0032262774 |
| LOC_Os12g43630 | Nutrition                            | lactate/malate dehydrogenase, putative, expressed              | Downstream | FindPeaks | 27058808 | 27060116 | FDR: 0.0          |
| LOC_Os02g45770 | *This gene is not endosperm specific | OsMADS6- MADS box family protein                               | Upstream   | FindPeaks | 27870106 | 27871129 | FDR: 0.0          |

**Note:** We used rice expression profile data in RICE GE data base to identify the endosperm specific genes by using the below mentioned criteria.

1. Endosperm has the highest expression among the 13 tissues we downloaded from riceGE (<http://signal.salk.edu/cgi-bin/RiceGE>) and the signal intensity is >500. This is to confirm genes are expressed in endosperm.
2. All the other tissues have intensity < 500. This is to confirm genes are not expressed in other tissues.
3. Endosperm signal intensity is 10 times higher than other tissues.
