# Supplementary material for: Polycomb Group Gene OsFIE2 Regulates Rice (Oryza sativa) Seed Development and Grain Filling via a Mechanism Distinct from Arabidopsis
Source: PubMed Central journal article supplement (PMC3591265; doi:10.1371/journal.pgen.1003322), 2013-03-07
Supplement: pgen.1003322.s007.pdf [file pgen.1003322.s007.pdf]

**Table S4.** List of antibodies used in the study

| <b>Antibody</b>                         | <b>Company</b> | <b>Catalog number</b> |
|-----------------------------------------|----------------|-----------------------|
| Peroxidase anti peroxidase (PAP)        | Sigma          | P1291                 |
| Biotinylated calmodulin (CAM)           | Calbiochem     | 208697                |
| Anti-H3 monomethyl-lysine 27 (H3K27me1) | Diagenode      | pAb-045-050           |
| Anti-H3 dimethyl-lysine 27 (H3K27me2)   | Millipore      | 07-452                |
| Anti-H3 trimethyl-lysine 27 (H3K27me3)  | Millipore      | 07-449                |
| Anti-H3 dimethyl-lysine 9 (H3K9me2)     | Millipore      | 07-212                |
| Anti-H3 trimethyl-lysine 9 (H3K9me3)    | Millipore      | 07-523                |
| Anti-histone H3 (H3)                    | Abcam          | Ab1791                |
