# Supplementary material for: Polycomb Group Gene OsFIE2 Regulates Rice (Oryza sativa) Seed Development and Grain Filling via a Mechanism Distinct from Arabidopsis
Source: PLOS journal article supplement (doi:10.1371/journal.pgen.1003322), 2013-03-07
Supplement: S3 (10.1371/journal.pgen.1003322.s003) [file journal.pgen.1003322.s003]

**Figure S3**

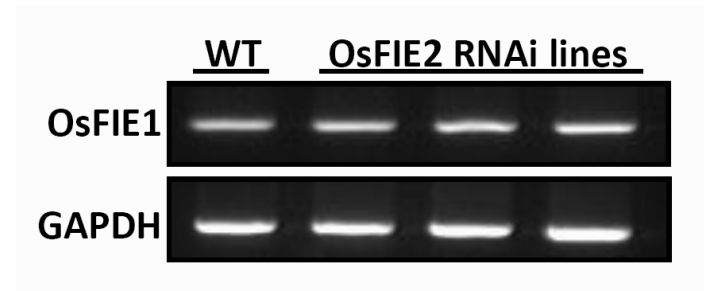

**Figure S3.** Reverse-Transcription-PCR analysis of the expression of *OsFIE1* gene in *OsFIE2* RNAi lines. GAPDH was used as internal control. Same amount of cDNA template was used in each sample. Primers are listed in Table S3.
